# Supplementary material for: Improving basic and translational science by accounting for litter-to-litter variation in animal models
Source: PubMed Central journal article supplement (PMC3661356; doi:10.1186/1471-2202-14-37), 2013-03-22

**A**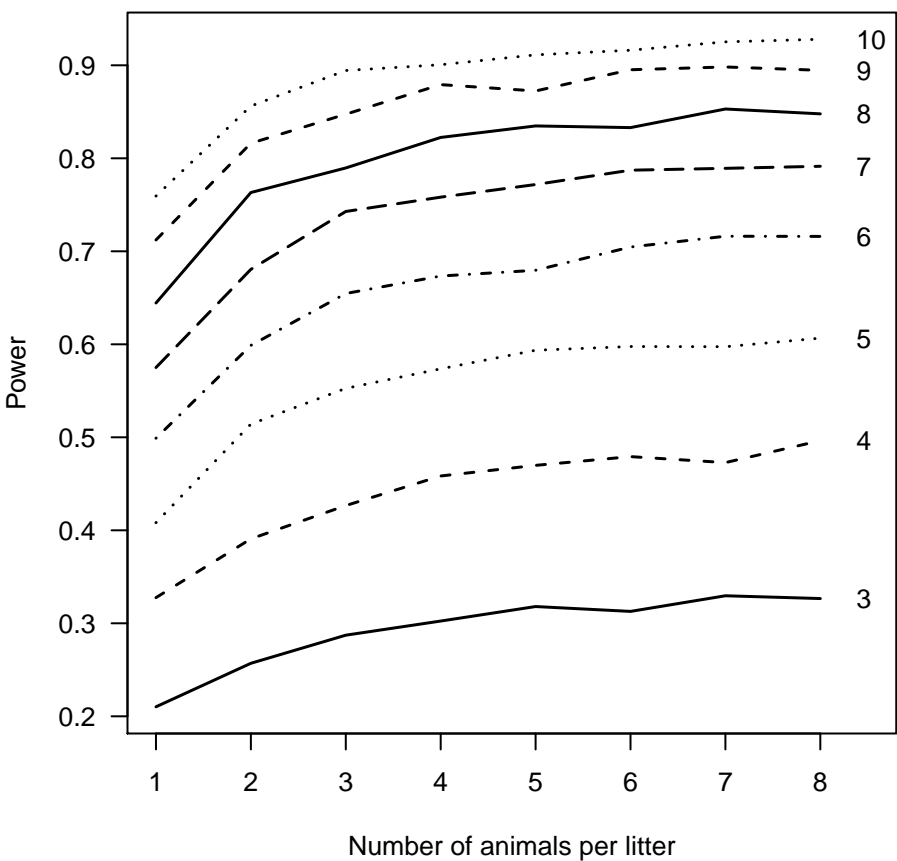**B**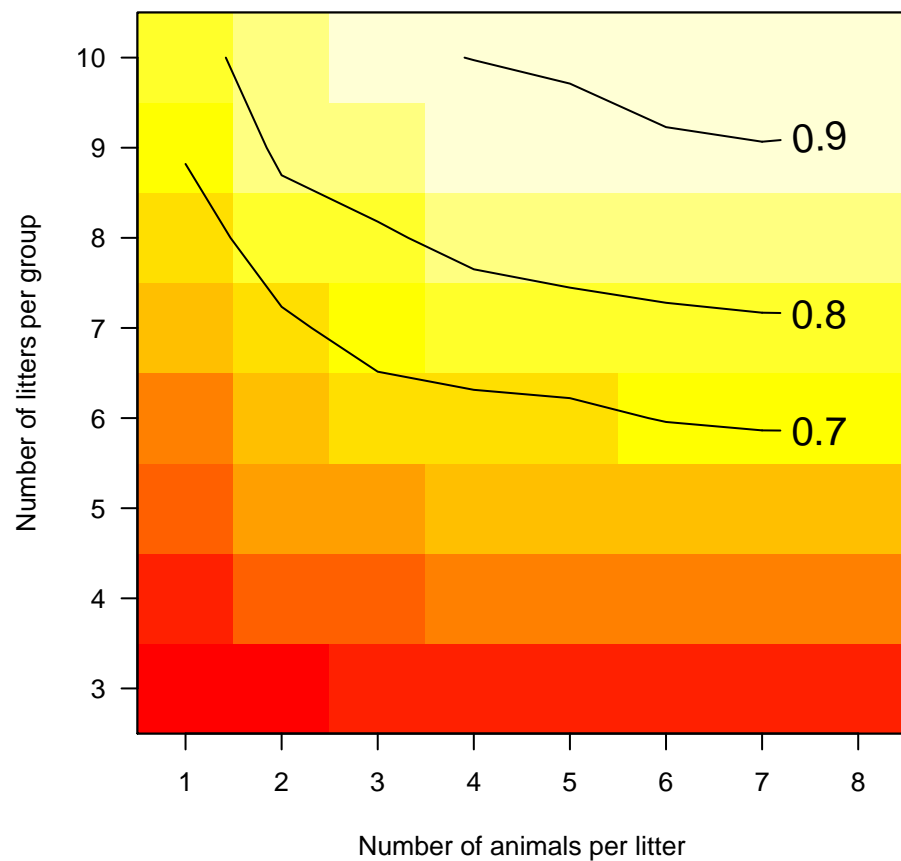**C**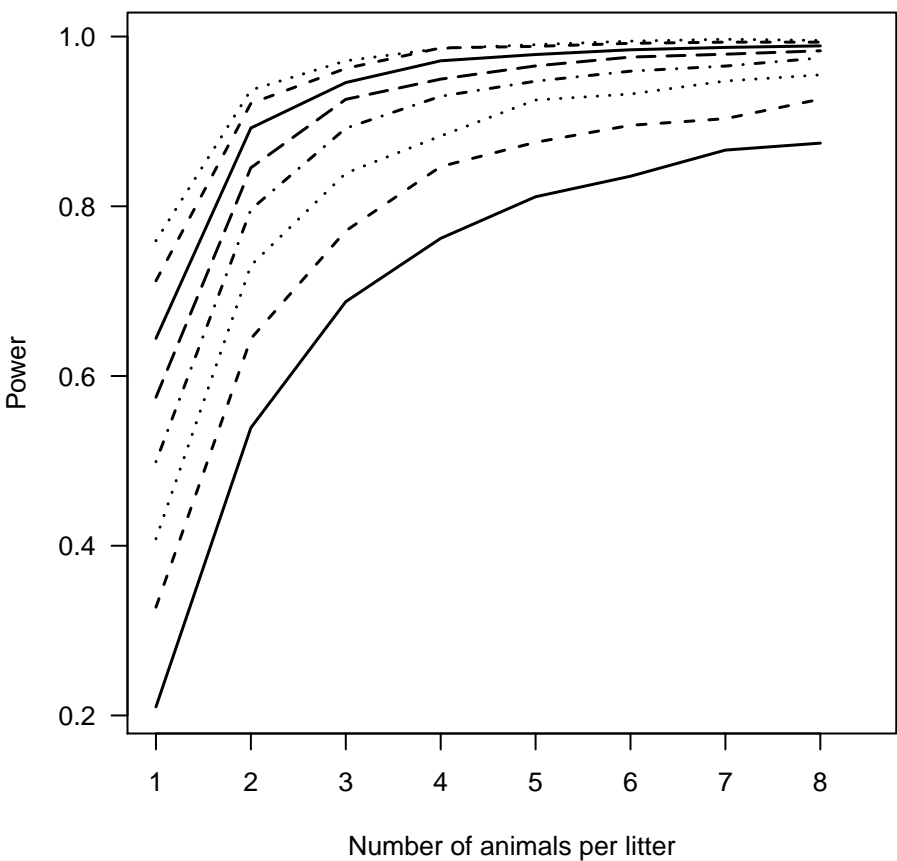**D**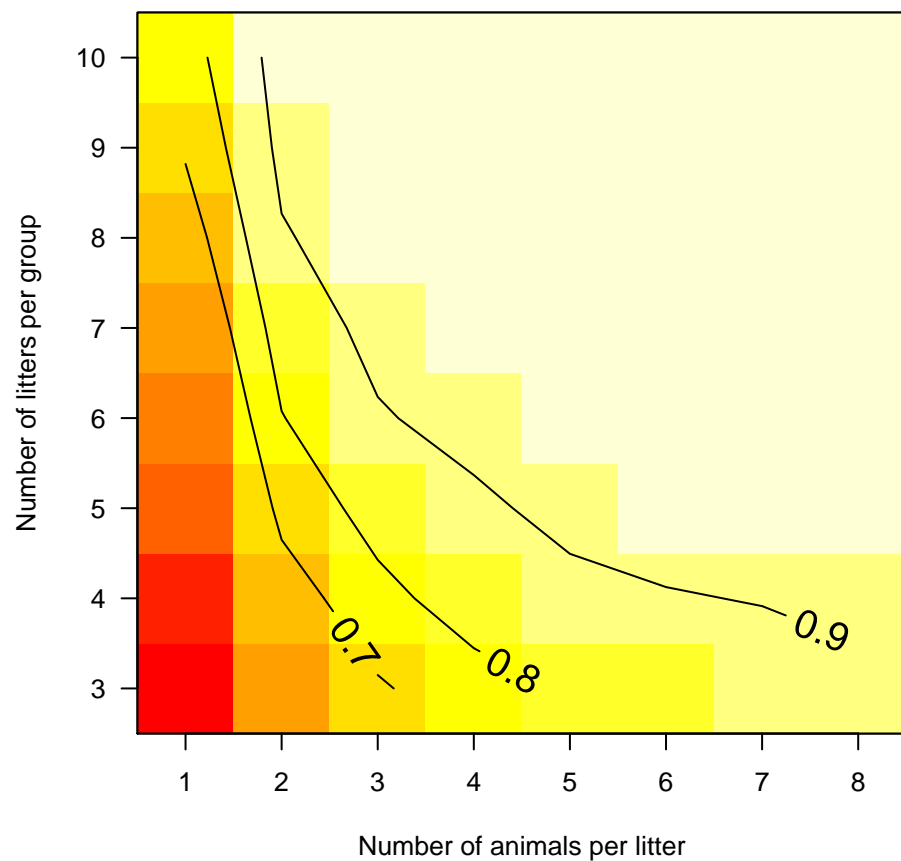

Supplement: 1471-2202-14-37-S4.pdf [file 1471-2202-14-37-S4.pdf]
